# Supplementary material
Source: Springer Nature journal article supplement (https://www.springermedizin.de/resource/supplementary/12974_2011_463_MOESM2_ESM.pdf/9601334)

**A**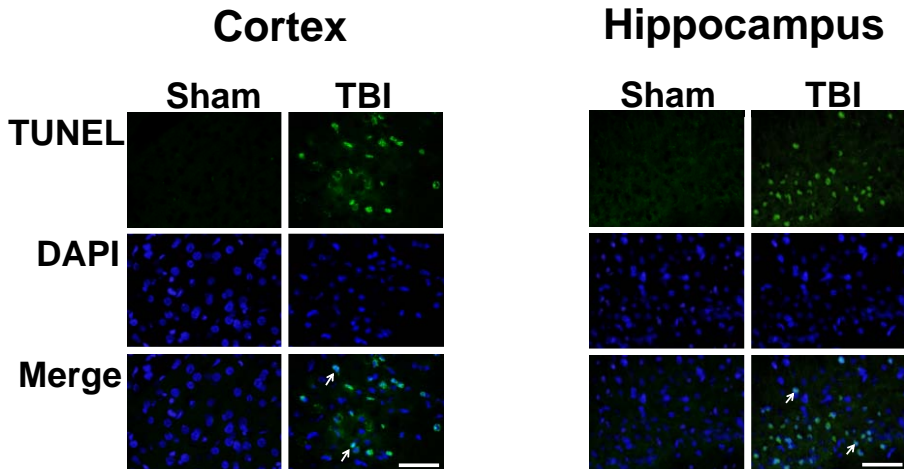**B**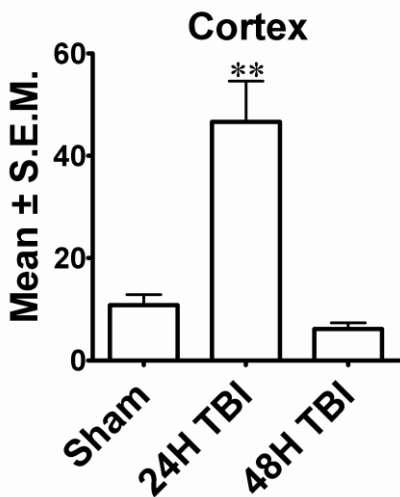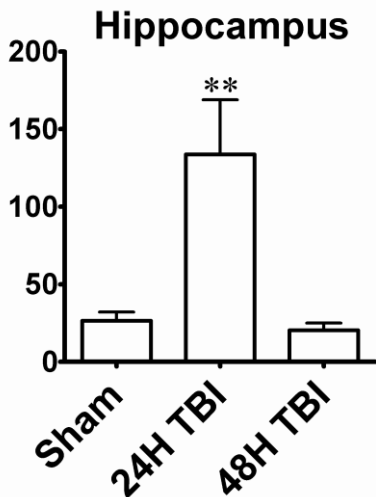

Supplement: MOESM2 [file 9601334]
